# Supplementary material
Source: publisher site journal article supplement (https://www.dovepress.com/article/513553)
Supplement: Supplementary file 1 [file 513553-revised-supplementary-figure-1.pdf]

## Supplementary Data file for the manuscript:

### “Cholesterol-rich antibiotic loaded liposomes as efficient antimicrobial therapeutics”

By: Evangelos Natsaridis<sup>1,2,&,#</sup>, Foteini Gkartziou<sup>2,2,&</sup>, Panagiota Mouzoura<sup>1</sup>, Spyridon Mourtas<sup>3</sup>, Konstantina Papadia<sup>1</sup>, Fevronia Kolonitsiou<sup>4</sup>, Pavlos Klepetsanis<sup>1,2, †</sup>, Catherine R. Dermon<sup>5</sup>, Iris Spiliopoulou<sup>4,6</sup>, Sophia G. Antimisiaris<sup>1,2, \*</sup>

<sup>1</sup>Laboratory of Pharmaceutical Technology, Department of Pharmacy, School of Health Sciences, University of Patras, Rion, 26504 Patras, Greece;

<sup>2</sup>Institute of Chemical Engineering Sciences, FORTH/ICE-HT, Platani, 26504 Patras, Greece;

<sup>3</sup>Department of Chemistry, University of Patras, Rion, 26510 Patras, Greece;

<sup>4</sup>Department of Microbiology, School of Medicine, University of Patras, Rion, 26504 Patras, Greece;

<sup>5</sup>Laboratory of Human and Animal Physiology, Department of Biology, University of Patras, Rion, 26504 Patras, Greece;

<sup>6</sup>National Reference Centre for Staphylococci, School of Medicine, University of Patras, Rion, 26504 Patras, Greece;

Correspondence: Sophia G. Antimisiaris; Lab. Pharm Technology, University of Patras, Pharmacy Building, Rio Campus 26504, Rio Patras, GR; Tel +30-2610-962332; e-mail: [santimis@upatras.gr](mailto:santimis@upatras.gr)

† Professor Pavlos Klepetsanis passed away on October 23, 2024

&: Equal Contribution

#: Current Address: Institute of Chemistry and Bioanalytics, University of Applied Sciences and Arts Northwestern Switzerland, Hofackerstrasse 30, 4132 Muttenz, Switzerland

This Supplementary Data file includes Figure S1, presented below.

## Supplementary Figure S1

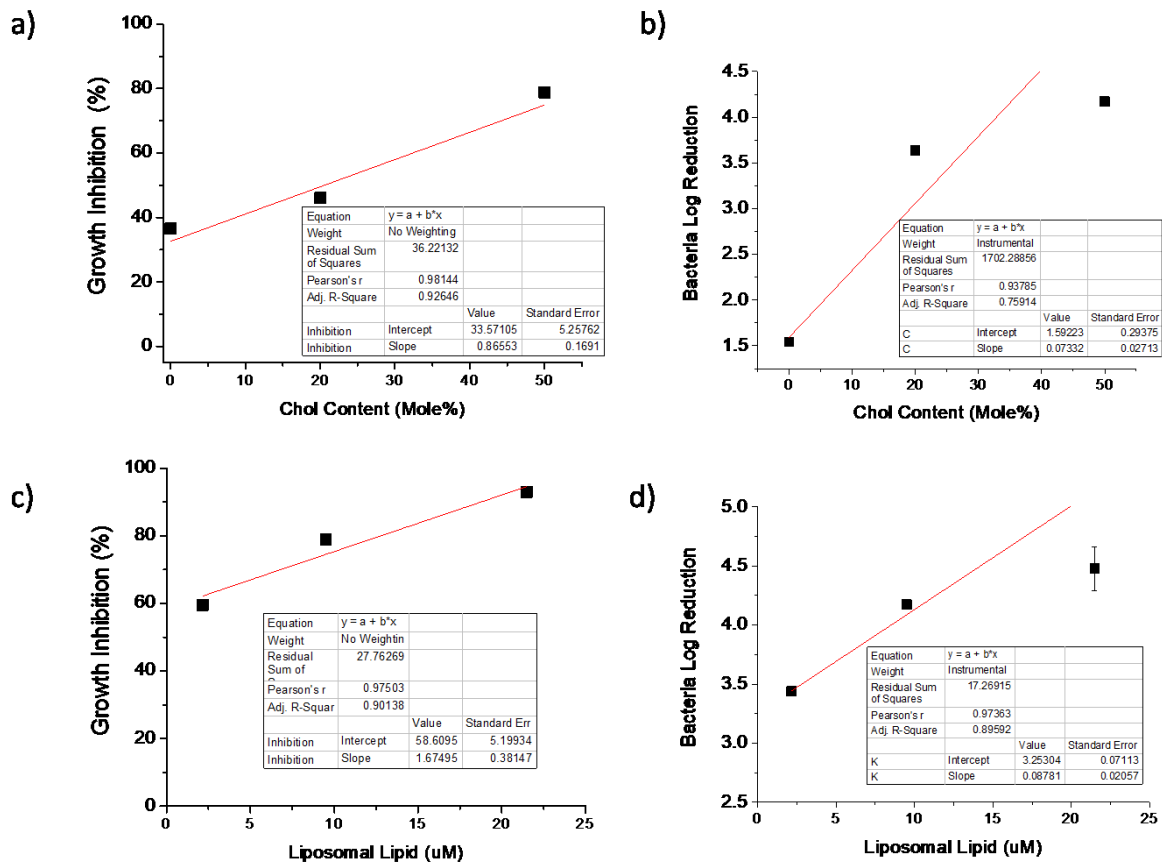

**Figure S1.** (a) Correlation between Bacterial Growth Inhibition (%) and liposomal Chol-content (mole%), (b) Correlation between Bacterial Log Reduction and liposomal Chol-content (mole%), (c) Correlation between Bacterial Growth Inhibition (%) and Liposomal Lipid concentration (µM), (d) Correlation between Bacterial Log Reduction and Liposomal Lipid concentration (µM). All results are from the experiments performed with *S.e* ATCC 35984 strain, in the current study, or from experiments performed under identical conditions and reported in Ref. 14.

### Reference

Natsaridis E, Gkartziou F, Mourtas S, Stuart MCA, Kolonitsiou F, Klepetsanis P, Spiliopoulou I, Antimisiaris SG. Moxifloxacin Liposomes: Effect of Liposome Preparation Method on Physicochemical Properties and Antimicrobial Activity against *Staphylococcus epidermidis*. *Pharmaceutics*. 2022 Feb 7;14(2):370. doi: 10.3390/pharmaceutics14020370. PMID: 35214102; PMCID: PMC8875207.
